# Supplementary material
Source: Springer Nature journal article supplement (https://www.springermedizin.de/resource/supplementary/12967_2013_1844_MOESM1_ESM.pdf/9574978)
Supplement: MOESM1 [file 9574978]

Assessed for eligibility (n = 56)

Excluded (n = 32)

- Cardiac origin (n = 10)
- Not meeting inclusion criteria of sepsis (n = 11)
- Survival < 12 hours (n = 2)
- Declined to participate (n = 10)
- Withdrawal (n = 1)

Death (n = 5)

Survival (n = 19)

- Mid-term (n = 6)
- Long-term (n = 13)
